# Supplementary material
Source: MDPI journal article supplement (https://www.mdpi.com/2079-9292/12/4/864)
Supplement: s1 [file s1]

## Supplementary Materials for:

# An Improved Theoretical Model to Extract the Optical Conductivity of Two-Dimensional Material from Terahertz Transmission or Reflection Spectroscopy

Qiuju Wang <sup>1</sup>, Jian Qin <sup>1</sup>, Yiming Xiao <sup>1</sup>, Wen Xu <sup>1,2,3,\*</sup> and Lan Ding <sup>1,\*</sup>

<sup>1</sup>School of Physics and Astronomy and Key Lab of Quantum Information of Yunnan Province, Yunnan University, Kunming 650091, China;

<sup>2</sup>Micro Optical Instruments Inc., Shenzhen 518118, China

<sup>3</sup>Key Laboratory of Materials Physics, Institute of Solid State Physics, Chinese Academy of Sciences, Hefei 230031, China

\*Correspondence: wenxu\_issp@aliyun.com (W.X.); dinglan@ynu.edu.cn (L.D.)

The derivation of the different orders of the transmitted and reflected fields:

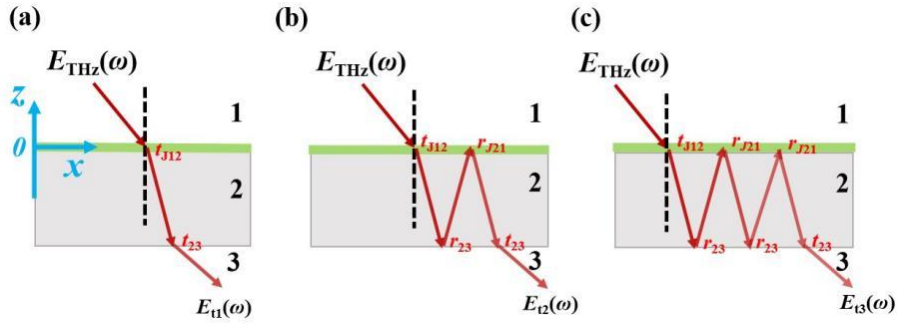

Figure S1. Schematics of the (a) 1st-order, (b) 2nd-order, and (c) 3rd-order transmitted fields.

Firstly, the THz field  $E_{\text{THz}}(\omega)$  propagates along a length of  $z-L$  in air, where  $z-L$  is the distance between the transmitter and receiver. This propagation introduces a phase change in the electric/magnetic field:

$$p_{\text{air}}(\omega, z-L) = \exp(-i\tilde{n}_{\text{air}}k_0(z-L)) = e^{-i\delta_{\text{air}}} \quad (\text{S1})$$

Since the response of the 2D material is treated as a surface current and  $d$  is neglected, the phase of the THz wave passing through the 2D material is only changed due to the imaginary part of  $\sigma$  rather than the thickness  $d$ . Then, the THz wave enters the substrate (medium 2) and propagates from the upper surface to the bottom surface in  $z$  direction. Therefore, this process can induce a phase change associated with  $\tilde{n}_2k_0L$  in the electric/magnetic field:

$$p_{\text{sam}}(\omega, L) = \exp(-i\tilde{n}_2k_0L) = e^{-i\delta} \quad (\text{S2})$$

By considering the transmission coefficients of each interface of the system shown Figure S1(a), the 1st-order transmitted field can be expressed as:

$$\tilde{E}_{t1}(\omega) = E_{\text{THz}}(\omega) e^{-i\delta_{\text{air}}} t_{J12} e^{-i\delta} t_{J23} \quad (\text{S3})$$

For the 2nd-order transmitted wave, two times of reflection on the upper/bottom interface should be considered in contrast to the 1st-order one, as shown in Figure S1(b). Accordingly, the THz wave passes through the substrate two more times and thereby introduce a phase term of  $e^{-i2\delta}$ . We can derive the

2nd-order transmitted field by including this phase term into Eq. (S4), which results in the following expression:

$$\tilde{E}_{t2}(\omega) = E_{\text{THz}}(\omega) e^{-i\delta_{\text{air}}} t_{J12} r_{23} r_{J21} e^{-i3\delta} t_{23}. \quad (\text{S4})$$

Similarly, the 3rd-order transmitted field shown in Figure S1(c) can be obtained as:

$$\tilde{E}_{t3}(\omega) = E_{\text{THz}}(\omega) e^{-i\delta_{\text{air}}} t_{J12} r_{23}^2 r_{J21}^2 e^{-i5\delta} t_{23}. \quad (\text{S5})$$

Considering the iterative process of multiple reflections, the  $m$ -th-order transmitted field is:

$$\tilde{E}_{tm}(\omega) = E_{\text{THz}}(\omega) e^{-i\delta_{\text{air}}} t_{J12} r_{23}^{m-1} r_{J21}^{m-1} e^{-i(2m-1)\delta} t_{23}. \quad (\text{S6})$$

Next, the results of the reflected fields can be obtained easily based on the discussion above and the schematics shown in Figure S2:

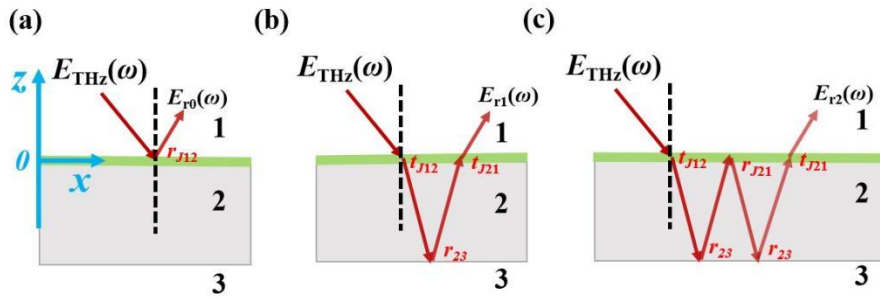

Figure S2. Schematics of the (a) 0-order, (b) 1st-order, and (c) 2nd-order reflected fields.

$$\tilde{E}_{r0}(\omega) = E_{\text{THz}}(\omega) r_{J12} e^{-i\delta_{\text{air}}}, \quad (\text{S7a})$$

$$\tilde{E}_{r1}(\omega) = E_{\text{THz}}(\omega) t_{J12} r_{23} t_{J21} e^{-i2\delta} e^{-i\delta_{\text{air}}}, \quad (\text{S7b})$$

$$\tilde{E}_{r2}(\omega) = E_{\text{THz}}(\omega) t_{J12} r_{23}^2 r_{J21} t_{J21} e^{-i4\delta} e^{-i\delta_{\text{air}}}. \quad (\text{S7c})$$

Considering the iterative process of multiple reflections, the  $m$ -th-order reflected field can be expressed as:

$$\tilde{E}_{rm}(\omega) = E_{\text{THz}}(\omega) t_{J12} r_{23}^m r_{J21}^{m-1} t_{J21} e^{-i2m\delta} e^{-i\delta_{\text{air}}}. \quad (\text{S8})$$

Furthermore, by taking the multiple reflections in the slab into account, the total reflection coefficient can be written as follows,

$$\tilde{r}_{\text{total}}(\omega) = r_{J12} + \frac{t_{J12} r_{23} t_{J21} e^{-i2\delta}}{1 - r_{J21} r_{23} e^{-i2\delta}} \left/ \left( r_{12} + \frac{t_{12} r_{23} t_{21} e^{-i2\delta}}{1 - r_{21} r_{23} e^{-i2\delta}} \right) \right. \quad (\text{S9})$$
